# Supplementary material for: Assessment of Arf6 Deletion in PLB-985 Differentiated in Neutrophil-Like Cells and in Mouse Neutrophils: Impact on Adhesion and Migration
Source: Hindawi journal article supplement (doi:10.1155/2020/2713074), 2020-04-07
Supplement: f1 [file 2713074.f1.pdf]

**Supplementary table**

| PLB-985 Arf6 WT<br>GFP <sup>-</sup> / 7AAD <sup>-</sup><br>(10 <sup>6</sup> cells) | PLB-985 Arf6 WT<br>GFP <sup>+</sup> / 7AAD <sup>-</sup><br>(10 <sup>6</sup> cells) | PLB-985 Arf6 T27N<br>GFP <sup>-</sup> / 7AAD <sup>-</sup><br>(10 <sup>6</sup> cells) | PLB-985 Arf6 T27N<br>GFP <sup>+</sup> / 7AAD <sup>-</sup><br>(10 <sup>6</sup> cells) |
|------------------------------------------------------------------------------------|------------------------------------------------------------------------------------|--------------------------------------------------------------------------------------|--------------------------------------------------------------------------------------|
| -                                                                                  | 5.7                                                                                | 10.29                                                                                | 3.47                                                                                 |
| 3.94                                                                               | 3.72                                                                               | 0.67                                                                                 | 0.22                                                                                 |
| 2.93                                                                               | 2.35                                                                               | 5.61                                                                                 | 2.07                                                                                 |
| 1.1                                                                                | 2.34                                                                               | 3.1                                                                                  | 0.9                                                                                  |

**Supplementary table 1.** The number of viable cells (7AAD<sup>-</sup>) GFP<sup>+</sup> and GFP<sup>-</sup> PLB-985 cells recovered following sorting after 48h post-transfection.

## Supplementary figures

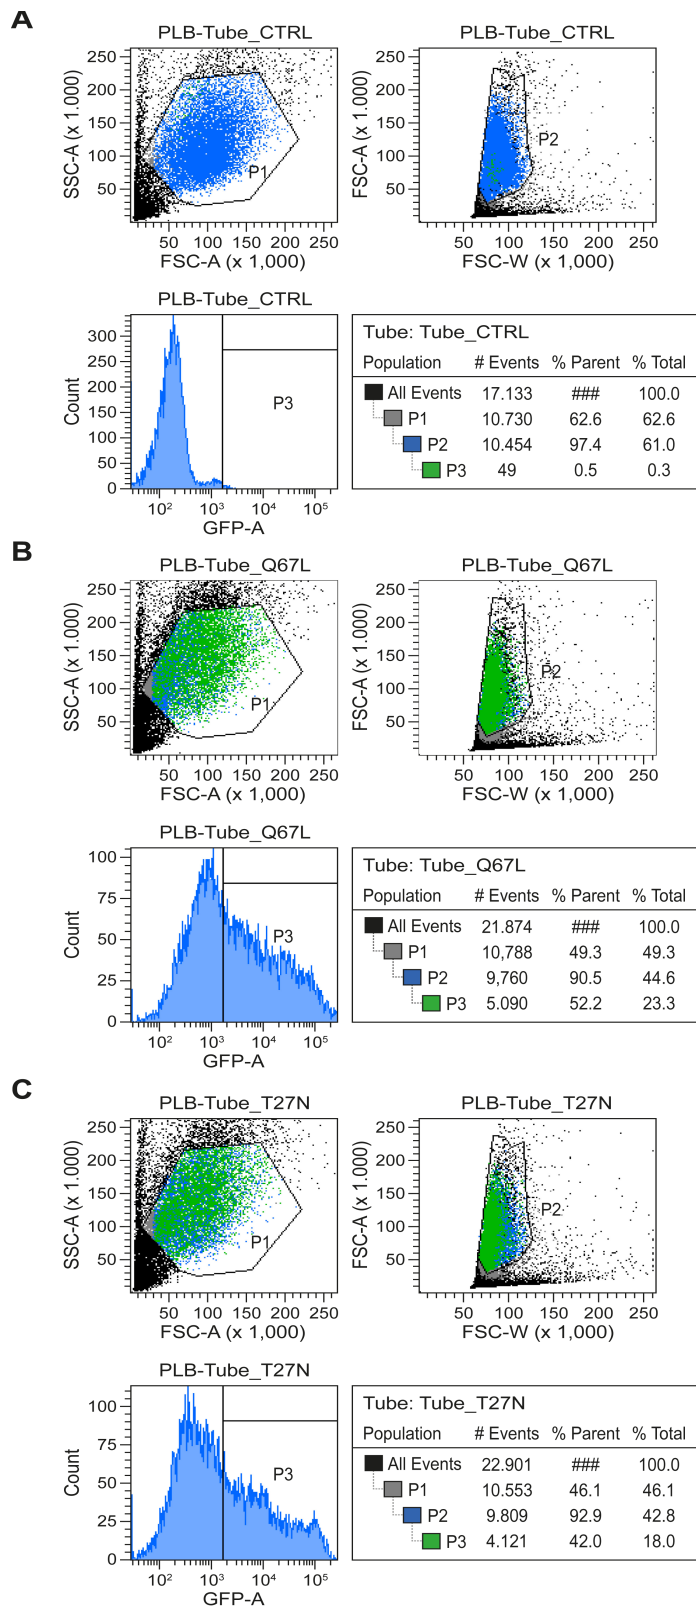

**Supplementary Fig. 1.** Analyses of expression of the GFP constructs by FACS at 48h post-transfection of PLB-985 cells.

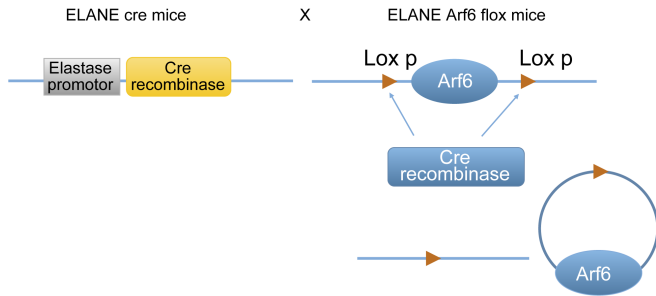

|                                            |  |  |
|--------------------------------------------|--|--|
| <b>flox<sup>+/+</sup>cre<sup>-/-</sup></b> |  |  |
| <b>flox<sup>+/+</sup>cre<sup>+/-</sup></b> |  |  |
| <b>flox<sup>+/+</sup>cre<sup>+/+</sup></b> |  |  |
| <b>Cre<sup>-/-</sup></b>                   |  |  |
| <b>Cre<sup>+/-</sup></b>                   |  |  |
| <b>Cre<sup>+/+</sup></b>                   |  |  |

**Supplementary Fig. 2.** Generation of PMN-Arf6 conditional KO mice and mouse genotypes used in this study.

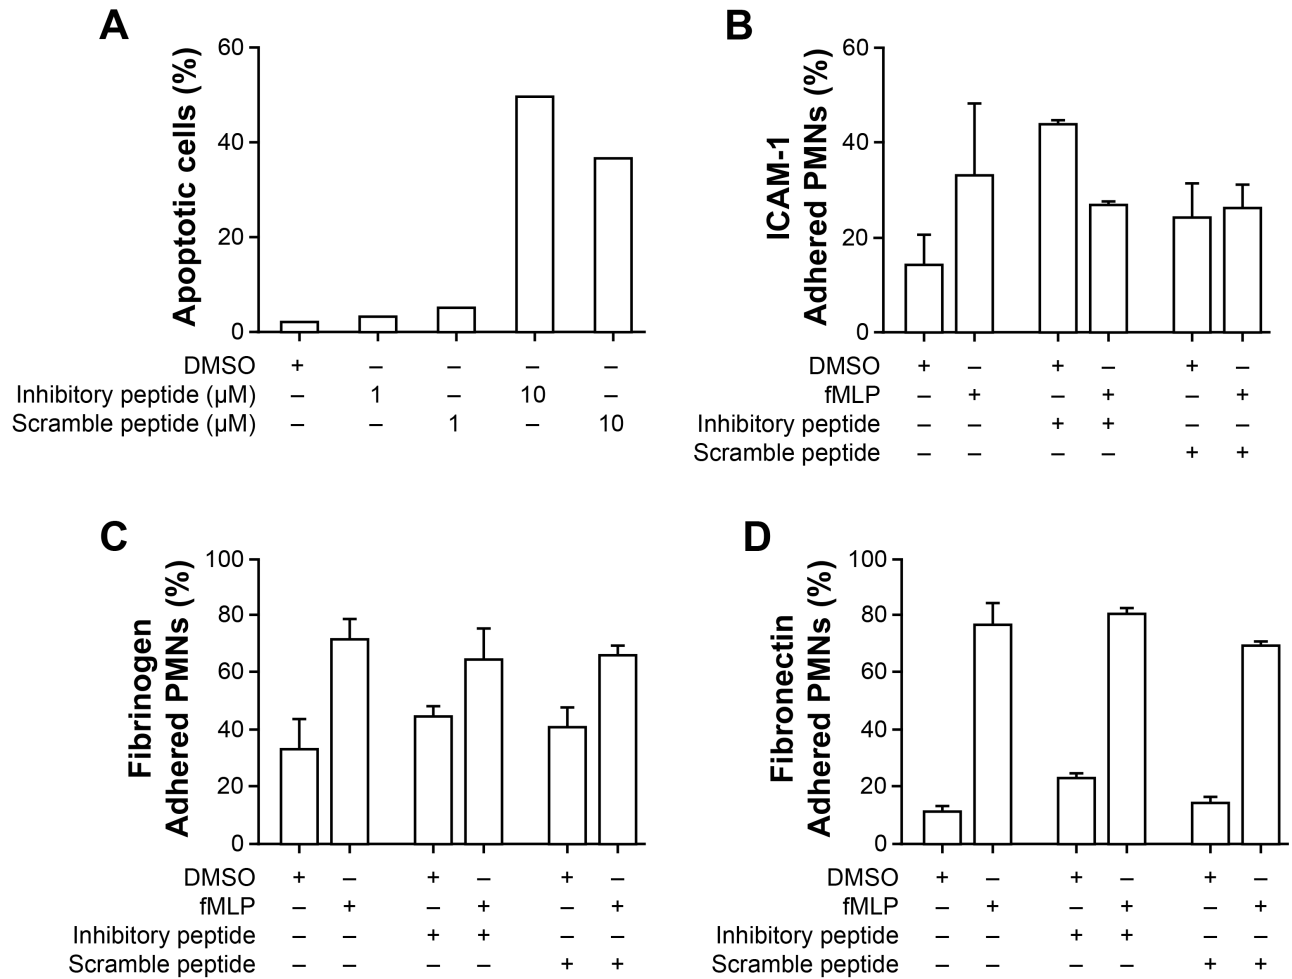

**Supplementary Fig. 3.** The N-myristoylated ARF6 inhibitory peptide induces apoptosis and a non-cytotoxic concentration of the inhibitory peptide does not inhibit fMLP-induced PMN adhesion. **(A)** Human PMNs were incubated with the N-myristoylated ARF6 inhibitory peptide and the scrambled peptide for 1h at 37°C and apoptosis was determined as described in Materials and Methods (n=1, triplicate measurements). **(B-D)** Calcein-labeled PMNs were incubated with the inhibitory or the scrambled peptide (1 μM) for 1h before stimulation with fMLP (10<sup>-6</sup>M) for 30 min. **(B)** Adhesion to immobilized ICAM-1 (n=2 independent experiments performed in triplicate). **(C)** Adhesion to immobilized fibrinogen (n=3 independent experiments performed in triplicate). **(D)** Adhesion to immobilized fibronectin (n=2 independent experiments performed in triplicate).

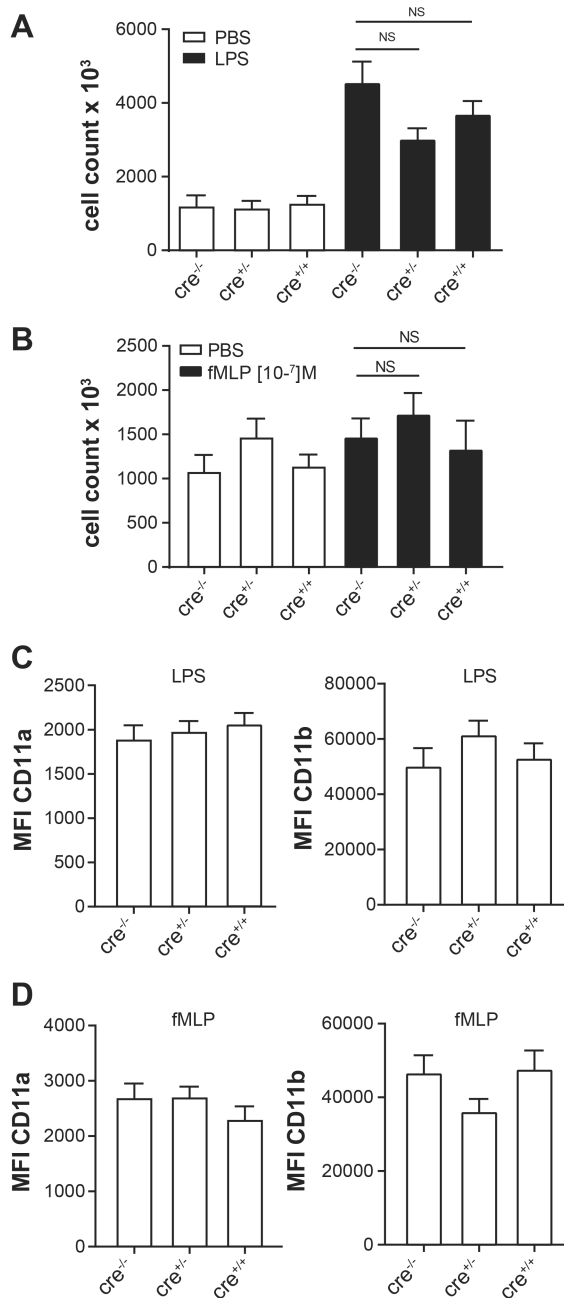

**Supplementary Fig. 4.** PMN migration into the air pouches and cell surface expression of the  $\beta 2$  integrins in air pouch PMNs of mice bearing one or two *Cre* transgenes. The amounts of PMNs recruited into the mouse air pouches injected with LPS (**A**) or fMLP (**B**) for 4h were monitored (PBS n=6 mice; LPS: n=30-46 mice; fMLP n=28-36 mice). (**C**) Ly6G<sup>+</sup> cells were gated to evaluate cell surface expression of CD11a (left panel) and CD11b (right panel) in PMNs recruited into the mouse air pouches injected with LPS (n=6 mice). (**D**) Cell surface expression of CD11a (left panel) and CD11b (right panel) in PMNs recruited into the mouse air pouches injected with fMLP (n=6-10 mice).
